# Supplementary material
Source: publisher figshare collection journal article supplement (https://tandf.figshare.com/articles/dataset/_/11388705)
Supplement: Supplementary file 1 [file 1]

## Sheet: Sheet1
SUPPLEMENTARY TABLE 1. Pair-wide ITS (above diagonals) and 28S similarity (below diaganols) between samples of genera within the Inocybaceae and Crepidotaceae based on blastn comparisons. GenBank sequences from representative samples (in most cases from generic types) are provided.
	ITS	28S	Inocybe	Nothocybe lineage	Pseudosperma clade	Inosperma clade	Mallocybe clade	Tubariomyces	Auritella
Inocybe	AF325664	AY038324	-	0.85	0.84	0.88	Unalignable	Unalignable	Unalignable
Nothocybe	KX171343	EU604546	0.97	-	0.85	0.88	0.88	Unalignable	Unalignable
Pseudosperma	JQ408772	MH220278	0.94	0.94	-	0.82	0.86	Unalignable	Unalignable
Inosperma	JQ801386	JQ815409	0.94	0.95	0.92	-	Unalignable	Unalignable	Unalignable
Mallocybe	AM882864	AY380401	0.94	0.95	0.94	0.94	-	Unalignable	Unalignable
Tubariomyces	GU907095	EU569855	0.95	0.96	0.93	0.94	0.94	-	Unalignable
Auritella	KT378201	AY380371	0.91	0.9	0.87	0.91	0.9	0.9	-
	ITS	28S	Crepidotus	Episphaeria	Nanstelocephala	Neopaxillus	Pleuroflammula	Simocybe
Crepidotus	AM882996	DQ986293	-	n/a	n/a	0.83	0.85	0.81
Episphaeria	None	None	n/a	-	n/a	n/a	n/a	n/a
Nanstelocephala	None	None	n/a	n/a	-	n/a	n/a	n/a
Neopaxillus	KY468512	JQ404443	0.96	n/a	n/a	-	0.82	0.81
Pleuroflammula	DQ494685	AF367962	0.96	n/a	n/a	0.95	-	0.81
Simocybe	DQ494696	AY745706	0.96	n/a	n/a	0.94	0.95	-
