# Supplementary material
Source: publisher figshare collection journal article supplement (https://tandf.figshare.com/articles/dataset/_/11388705)

nuc rRNA  
(18S, 28S, 5.8S)  
gene tree

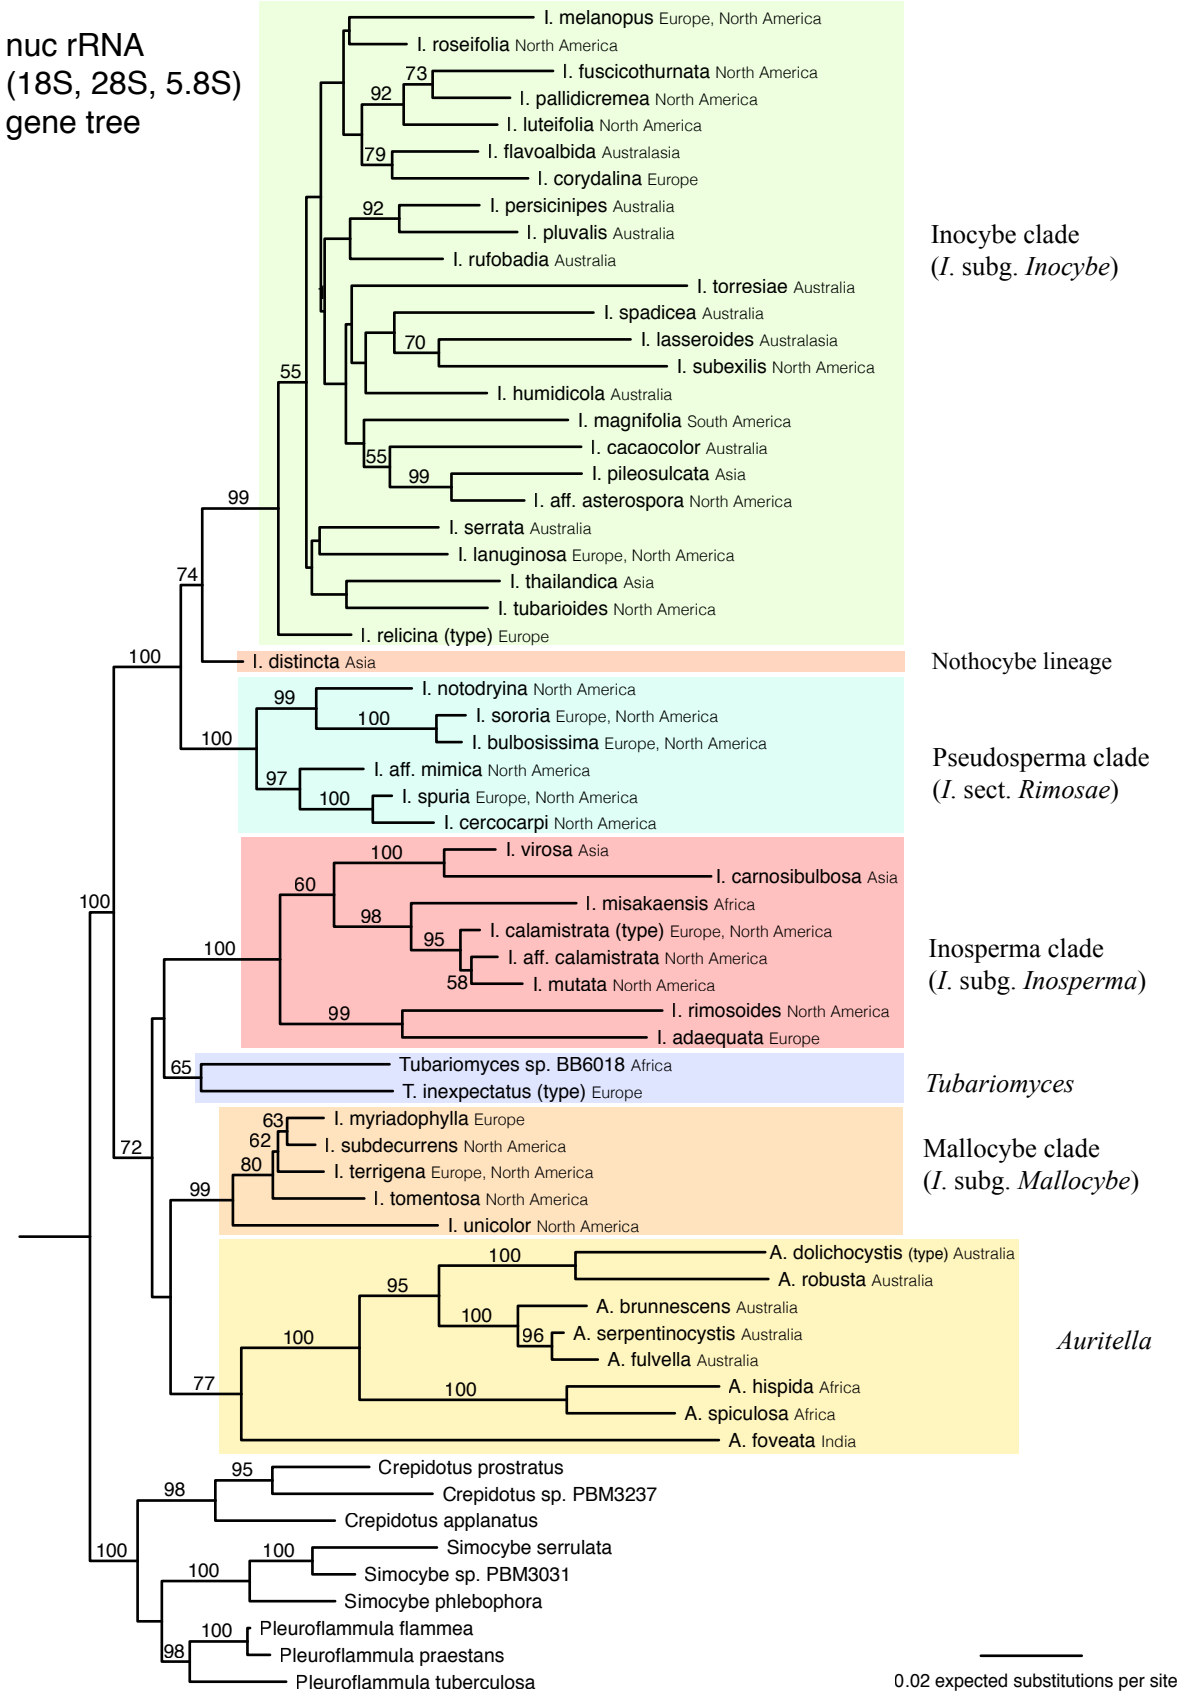

Supplement: Supplementary file 1 [file 1]

# *tef1* gene tree

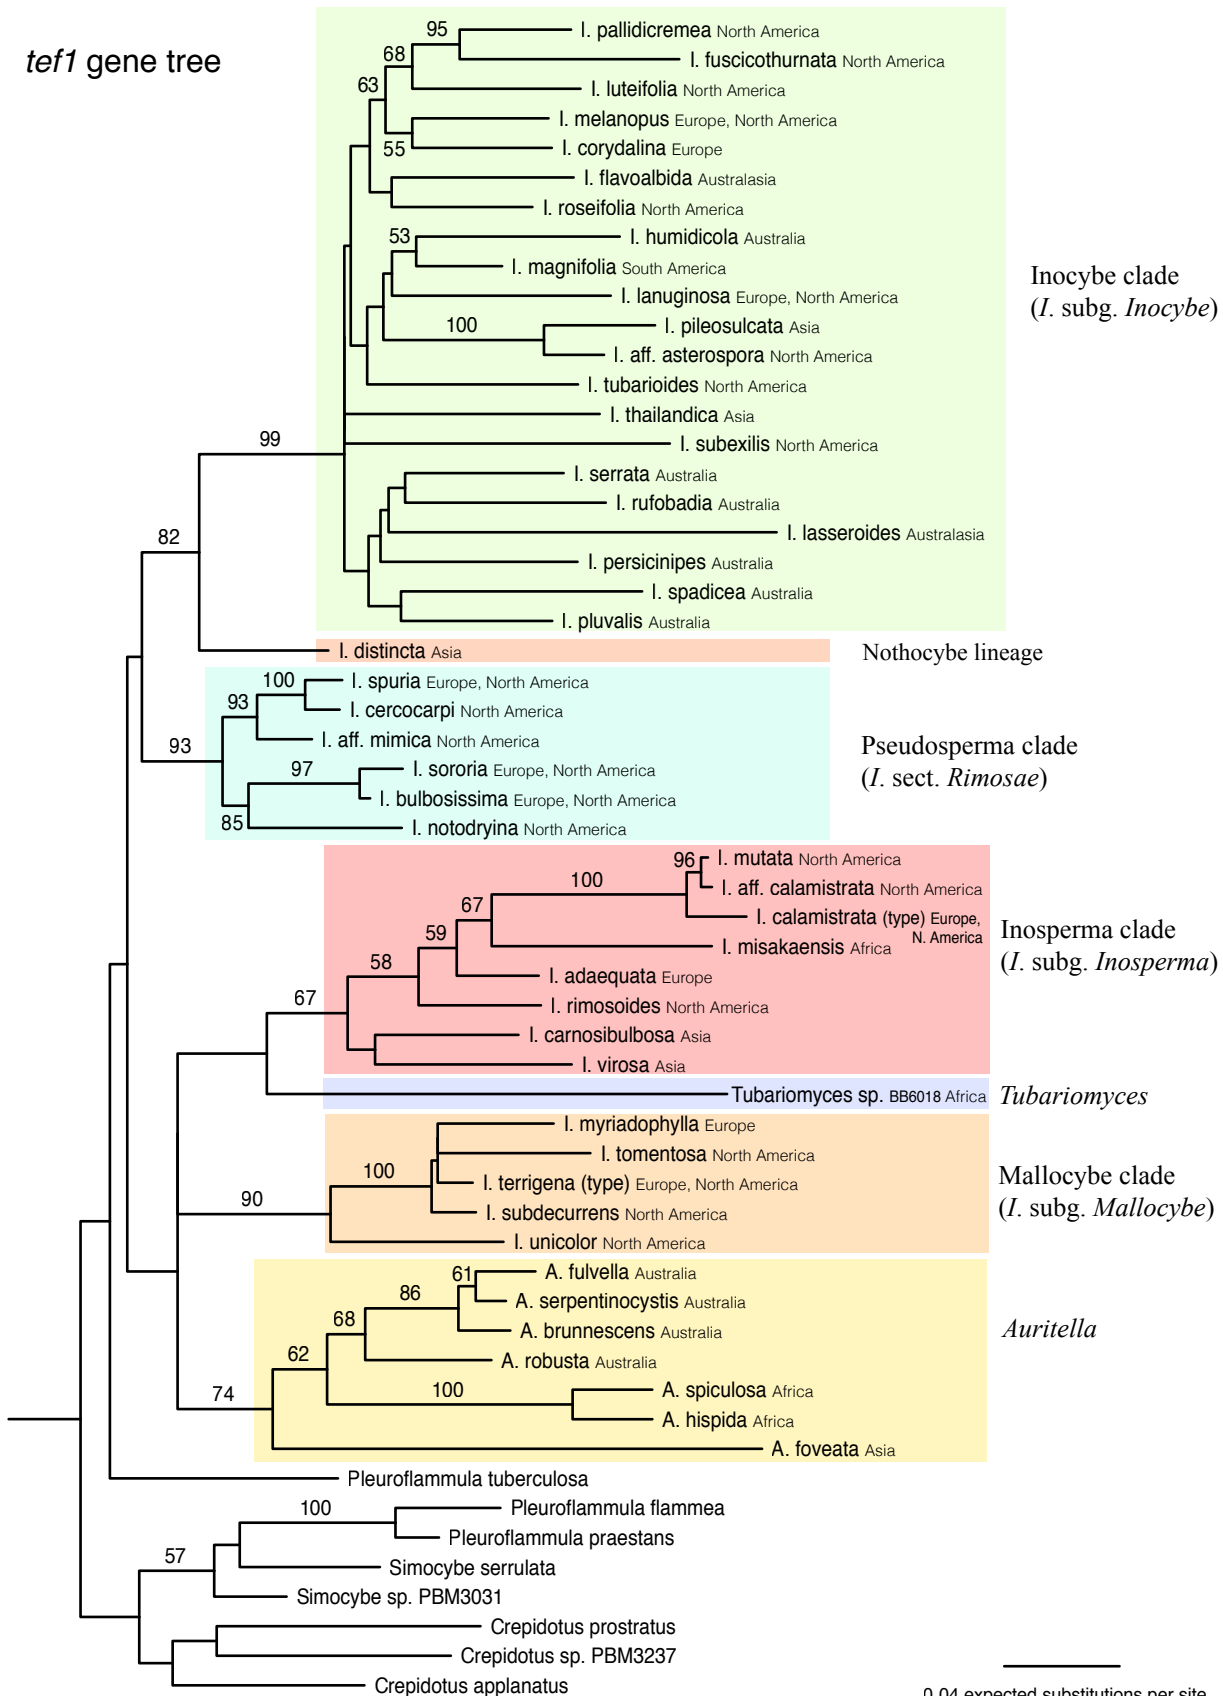

Supplement: Supplementary file 2 [file 1]

# *rpb2* gene tree

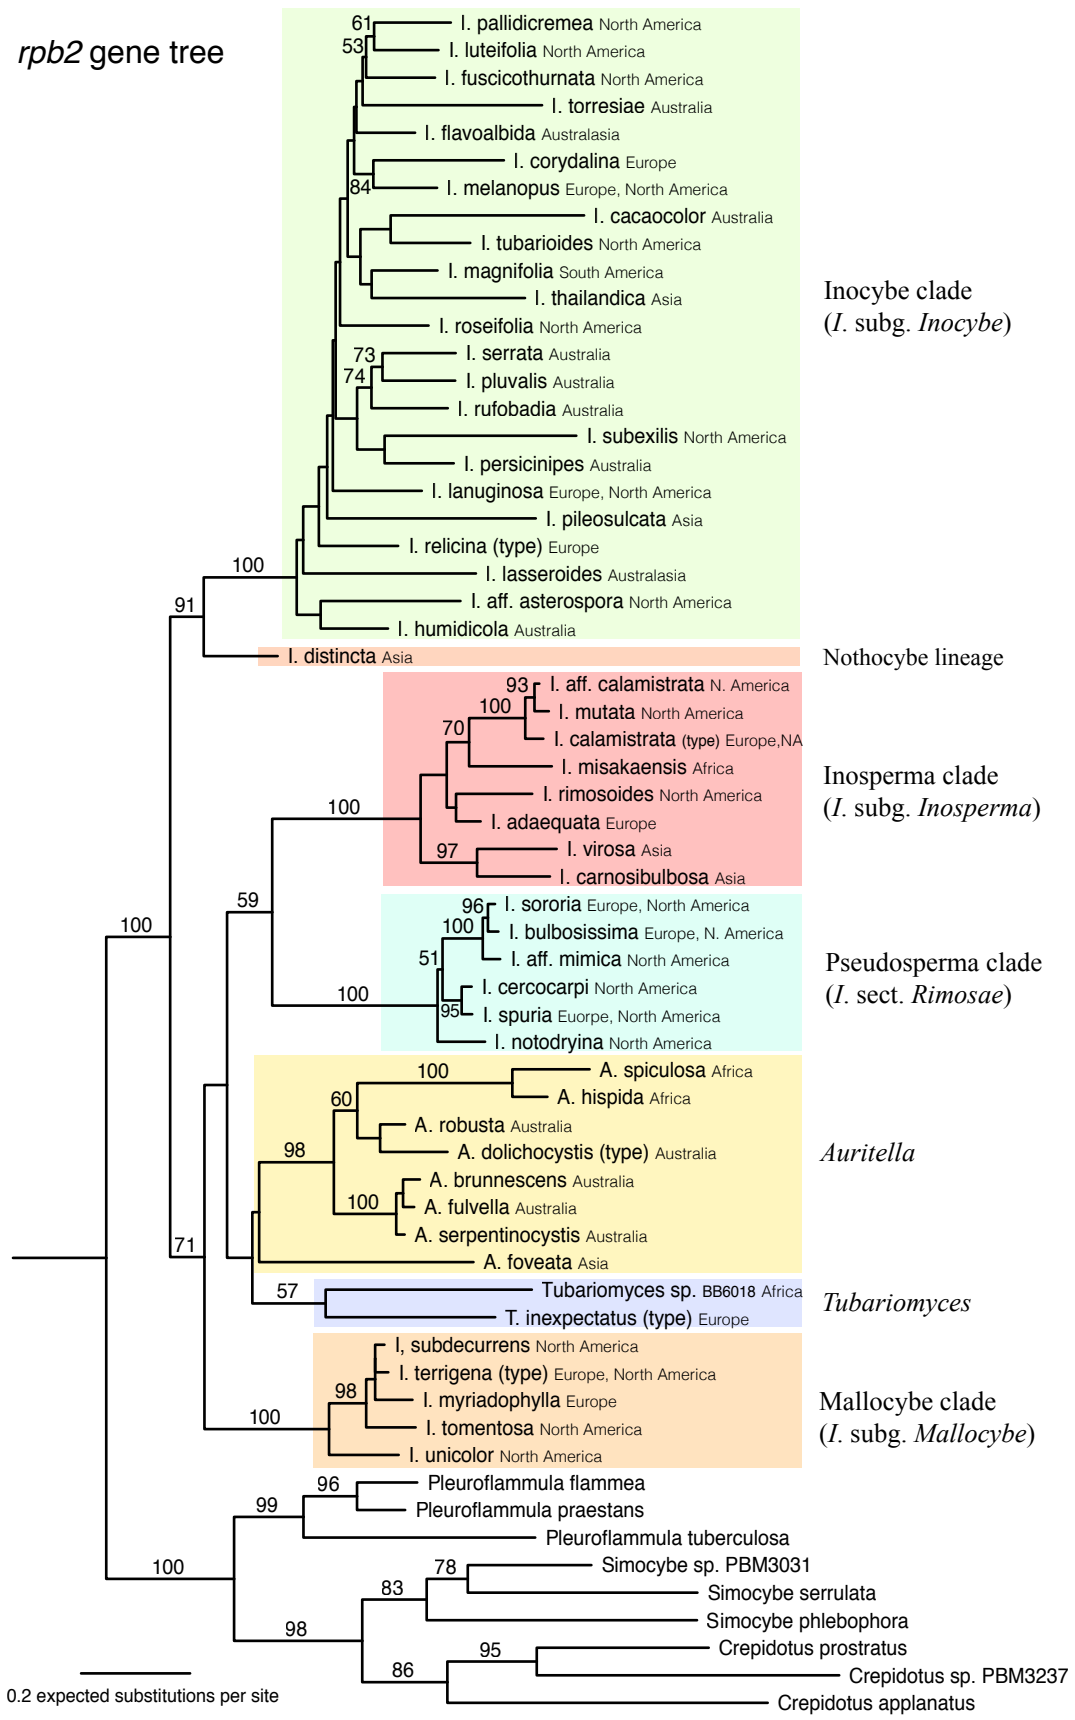

Supplement: Supplementary file 3 [file 1]

rpb1 gene tree

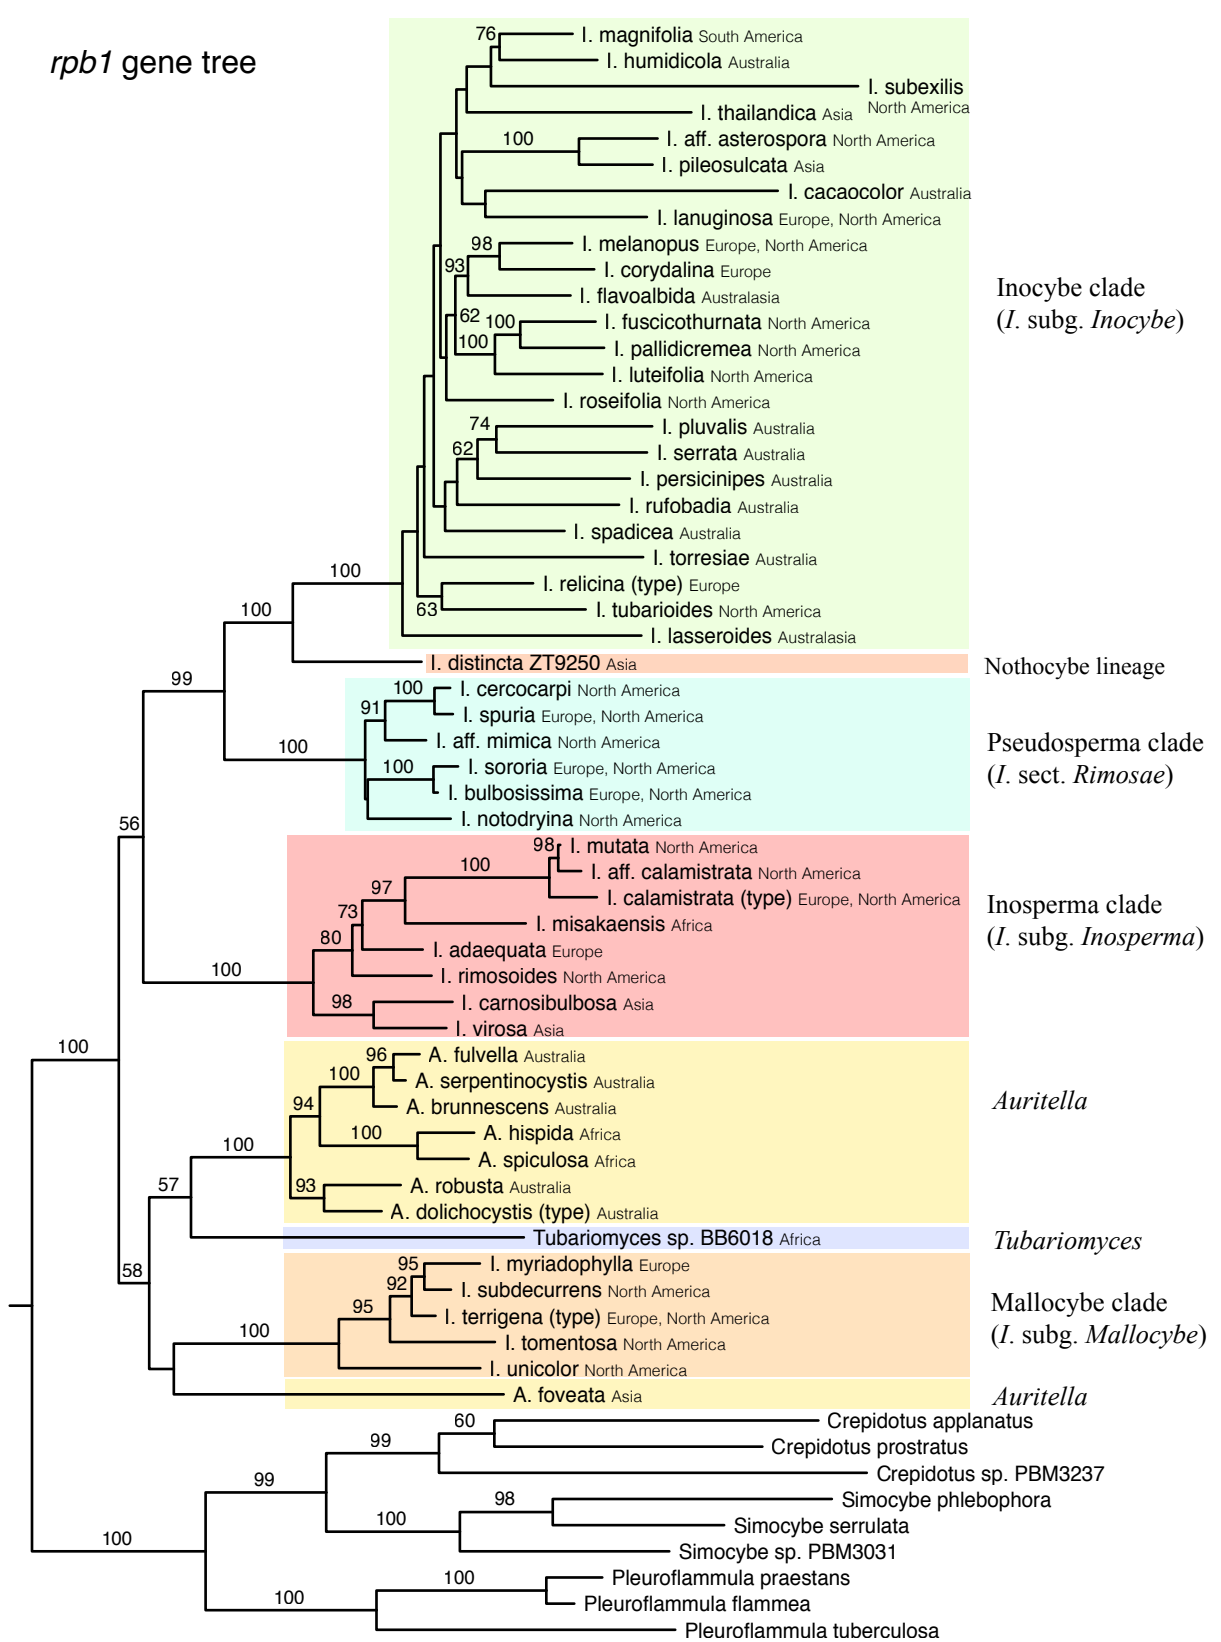

Supplement: Supplementary file 4 [file 1]
